# Supplementary material
Source: PubMed Central journal article supplement (PMC7969419)

## Assessing Lung Cancer Absolute Risk Trajectory Based on a Polygenic Risk Model

### Supplementary Materials

#### Study Populations

**Lung cancer OncoArray project of the International Lung Cancer Consortium (ILCCO).** The ILCCO Lung cancer OncoArray project has been previously published[1]. In brief, it included 26 lung cancer studies that were genotyped by the Illumina OncoArray [2], which comprised a GWAS backbone and a custom cancer panel to facilitate in-depth interrogation of the cancer susceptibility genes[3]. For this study, we included only unrelated individuals with European descents, and a total of 18,316 lung cancer cases and 14,025 controls were used for PRS construction. All lung cancer patients were histologically confirmed. The imputation was conducted based on 1000 Genome v.3 as described previously [1]. A total of 13,119 cases and 10,008 controls had epidemiological data required for the risk prediction modeling (such as demographics, smoking history, COPD and family history of lung cancer) and was used for the downstream analysis combining genetic and epidemiological data (**Supplementary Figure 1**). The protocol of the pooled analysis was approved by the Research Ethics Review Board at the Sinai Health System. The recruitment and data collection of all participating research institutes was approved by the local ethics review committee.

**UK Biobank.** UK Biobank is a population-based cohort study of over 500,000 participants, aged 40-69 at entry, recruited throughout the United Kingdom between 2006 to 2010 [4]. The details of the study design and data elements have been previously described [4]. In brief, epidemiological information such as lifestyle risk factors, medical history and family history of lung cancer were collected via study questionnaires. In addition, extensive physical measurement and biospecimens were collected at baseline. Lung cancer diagnosis was obtained through record linkage with death and cancer registries with the follow-up time up to date of death, lung cancer diagnosis, or March 31, 2016 (in England and Wales) and Oct 31, 2015 (in Scotland) per censor date defined by UKB. To minimize the possibility of including lung cancer metastasis, we excluded lung cancer that occurred

within 5 years of different primary cancer. In addition, prevalent lung cancer cases diagnosed prior to baseline enrollment were excluded. A total of 1,768 primary lung cancer cases and 334,163 unrelated controls with European ancestry were available for analysis (**Supplementary Figure 1**). Genotyping was completed using the UK BiLEVE Axiom array and the UK Biobank Axiom array [5]. Imputation was performed based on the Haplotype Reference Consortium (HRC) reference panel as the first choice and supplemented with those with a combination of UK10K and 1000 Genomes panels. This research was conducted with approved access to UK Biobank data under applications number 23261.

## Statistical Analysis

### Construction of Polygenic Risk Score

In general, the polygenic risk score (PRS) is constructed as the sum of the number of minor alleles weighted by their effect coefficients.

$$PRS = \sum_k \beta_k g_k$$

Where,  $\beta_k$  is the estimated per allele log-odds ratio for the association between lung cancer and the minor allele of the  $k^{th}$  variant and  $g_k$  is the number of genotyped minor alleles 0,1,2 of the  $k^{th}$  variant or genotype dosage.

There are two components included in PRS: one is comprised of the known lung cancer susceptibility loci previously identified, and one included additional loci that previously did not reach genome-wide significance, but were identified in this analysis through application of a machine learning algorithm. The list of known lung cancer loci were compiled based on literature and NHGRI-EBI GWAS Catalog [6], including variants that were associated with either overall or histology-specific lung cancer. We also included several variants that did not reach the stringent GWAS level of significance, but could potentially improve risk stratification: variants identified on the basis of their functional significance[7], uncovered through their association with first-degree family history of lung cancer [8], and those identified by a fine-mapping investigation of lung cancer

susceptibility loci 5p15.33 [9]. In addition, we included genetic variants identified for related disease traits, such as lung function impairment at the genome-wide significance level ( $p < 5 \times 10^{-8}$ ) [1, 7-11]. Correlated variants with  $r^2$  more than 0.2 based on the 1000 Genome v3 panel and the variants representing independent loci with the strongest statistical significance were retained. The final component of known lung cancer loci included 35 variants (PRS-35), as shown in the **Supplementary Table 1**, along with their log-odds ratio estimated based on the OncoArray meta-analysis [1], the largest lung cancer study to date, thus providing the most reliable effect estimates.

To maximize the prediction performance of the PRS, we went beyond the previously known loci and performed a penalized regression using *lasso* on a pre-selected set of SNPs that passed the suggestive significance-level ( $p < 5 \times 10^{-6}$ ) in either overall or histology-specific lung cancer based on the combined analysis of OncoArray and previous ILCCO genome-wide studies [1]. All pre-selected SNPs had minor allele frequencies of at least 0.05 and were filtered for IMPUTE2 imputation quality score ( $\text{INFO} > 0.3$ ). The model selection was performed based on the lung cancer OncoArray data with 32,341 subjects of European ancestry with genetic data (18,316 lung cancer patients and 14,025 controls) as the training set. The most optimal penalty parameter ( $\lambda$ ) was selected based on a 10-fold cross-validation [12]. Each fold of the cross-validation analysis was adjusted by age, sex and top five principal components (PCs). Each variant selected was weighted by the lasso-shrunken parameter estimate in the PRS.

The best performing lasso model selected 221 variants, and among those, 93 variants remained after applying an  $r^2$  threshold of 0.2. The final PRS (PRS-128) was constructed by combining PRS-35 which represents the known loci, and the additional 93 SNPs selected from the lasso analysis (**Supplementary Table 1**).

We compared effect sizes of PRS for lung cancer risk by groups defined by PRS deciles (<10%, 10–20%, 20–40%,

60–80%, 80–90%, >90%); by histologic-subtypes (adenocarcinoma, squamous cell, small cell); smoking status and family history of lung cancer in first degree relatives.

#### Assessment of multiplicative interactions between PRS and epidemiologic factors

We performed likelihood ratio tests to evaluate multiplicative interactions assumption between PRS and the epidemiologic risk factors age, family history of lung cancer and smoking variables in the OncoArray datasets. We did not observe consistent evidence of interactions between PRS and risk factors, except with age (interaction  $p=0.02$ ) and smoking status (interaction  $p=0.01$ ). The AUC however did not change when we incorporate the interaction terms into the model. We therefore report the parsimonious model, which reached the same predictive accuracy without interaction terms. None of the other risk factors showed consistent evidence of interactions with the polygenic risk scores.

#### PRS Validation and Model Evaluation based on the UK Biobank dataset

Standard quality control criteria were applied to the UK Biobank data to remove duplicates, relatedness, and sex discrepancies as previously described [5]. The PRS in the UK Biobank was computed based on the same weights derived and applied in the OncoArray dataset to avoid model overfitting. Fourteen (2 from PRS-35) variants were not genotyped or imputed based on Haplotype Reference Consortium (HRC) panel, and thus were not included in the PRS used in UK Biobank, which resulted in a total of 114 variants in the PRS for the analysis in UK Biobank. All of the variants in the PRS passed imputation quality threshold ( $INFO>0.3$ ). To validate the PRS constructed in OncoArray, we used the same effect coefficients for the parameters included in the model (**Supplementary Table 2**).

To eliminate the potential over- or under-estimation when importing coefficients of a risk model previously built in a different population and to integrate PRS into the model, we recalibrated the  $PLCO_{all2014}$  model based on random sample of 50% of UKB data, while holding the remaining 50% of data for strict prospective validation.

We computed the log-odds of lung cancer ( $Z$ ) in UKB based on the original  $PLCO_{all2014}$  coefficients with the addition of two PRS coefficients. Then we fit a logistic regression model in the 50% training sample with lung cancer status as the outcome and  $Z$  as the sole predictor. The beta coefficient for  $Z$ ,  $\hat{\beta}_Z$ , is the re-calibrated slope (i.e. the adjustment factor). For absolute risk trajectories,  $\hat{\beta}_Z$  was applied to regularize the  $PLCO_{all2014}$  coefficients.

In addition, to acknowledge the markedly different baseline risk and potential risk factors for never smoker population, we built a *de novo* model for never smokers based potential predictors defined *a priori*, including age, sex, education, BMI, personal history of cancer, family history of lung cancer in first degree relatives, lung function ( $FEV_1/FVC$ ), ambient air pollution and second hand smoke. We adapted the split design and used 80% of the UKB data for training and 20% was set aside for hold-out testing set. Within the 80% training data, we applied 10-fold cross-validation to select the parsimonious model. The model with ambient air pollution and second-hand smoke did not improve the AUC (0.670, 95%CI=0.611-0.728), therefore the final parsimonious model includes age, sex, education, BMI, personal history of cancer, family history of lung cancer and lung function.

Evaluation of all model performance, including model calibration and discrimination were evaluated based on the hold-out set only. Model calibration was assessed by evaluating how much the slope of the calibration line (plotting the predicted vs the observed probabilities) deviates from the ideal of 1. The 95% confidence intervals of the predicted risk were computed with the percentile-based bootstrap method using 100 replicates. Calibration was formally tested using Spiegelhalter's  $z$  statistic and the corresponding p-values [13, 14]. The risk model's ability to discriminate was assessed by the area under the receiver operator characteristic curves (AUC). Risk discrimination improvement of the developed PRSs was evaluated by comparing a base model with epidemiologic risk factors and a model that includes epidemiologic risk factors and PRS.

### Absolute risk estimation

The absolute risk of developing lung cancer was estimated based on Cox proportional hazards model accounting for the presence of competing risk of all causes of death other than lung cancer, as originally described by Benichou and Gail[15]. The risk in a given time interval  $(a, a + \tau)$  is estimated by integrating a model of relative risks, age-specific lung cancer incidence rates and a representative distribution of risk factors of the population of interest, where,  $X$  represents the risk factors,  $h_0(t)$  is the baseline hazard function,  $m(t)$  is age-specific competing hazards of mortality,  $u$  as the time interval for the estimation of the integral, and  $\beta$  is a vector of log-odds ratios. The underlying assumption of the integrated risk prediction model is that risk factors act in a multiplicative fashion on the baseline hazard function.

$$AR(a, a + \tau) = \int_a^{a+\tau} h_0(t) \exp(X\beta) \exp\left(-\int_a^t [h_0(u)\exp(X\beta) + m(u)] du\right) dt$$

To estimate the absolute risk in the UK Biobank, the frequency distribution of epidemiologic risk factors was estimated based on the full UKB cohort. Age-specific lung cancer rates and competing rates for mortality rates obtained from Cancer Research UK, 2012[16]. The age-specific lung cancer rates specifically for never smokers were derived from the UK Million Women Cohort[17], and the average male to female incidence ratio of lung cancer in never smokers previously reported in population cohorts[18]. The underlying assumption of the integrated risk prediction model is that risk factors act in a multiplicative fashion on the baseline hazard function.

### NLST PRS Simulation and Projection

PRS distributions in NLST were simulated conditional on lung cancer status and family-history of lung cancer based on the effect estimation and allele frequency from the validation set (UK Biobank) using iCARE package as previously described [19, 20]. Age-specific overall lung cancer incidence rates were obtained from the Center for Disease Control, 2013[21]. The majority (>90%) of all NLST participants are of European ancestry, thus we used

incidence rates of non-Hispanic white population in the US for the absolute risk projection. Since NLST represents a selected high risk population, not the general population, the overall incidence rates of lung cancers in the US population were multiplied by an adjustment ratio of 4.3, derived by the ratio of the percentage of all lung cancer that are eligible for NLST (26.7%) and the US population that meet the NLST-eligibility criteria (6.2%)[22]. We simulated five independent PRS distributions for the NLST cohort. The weights of the PRS were based on the coefficient estimated from the validation set (UK Biobank).

### Reference list

1. McKay JD, Hung RJ, Han Y, *et al.* Large-scale association analysis identifies new lung cancer susceptibility loci and heterogeneity in genetic susceptibility across histological subtypes. *Nat Genet* 2017;49(7):1126-1132.
2. Amos CI, Dennis J, Wang Z, *et al.* The OncoArray Consortium: a Network for Understanding the Genetic Architecture of Common Cancers. *Cancer epidemiology, biomarkers & prevention : a publication of the American Association for Cancer Research, cosponsored by the American Society of Preventive Oncology* 2016.
3. Amos CI, Dennis J, Wang Z, *et al.* The OncoArray Consortium: A Network for Understanding the Genetic Architecture of Common Cancers. *Cancer Epidemiol Biomarkers Prev* 2017;26(1):126-135.
4. Sudlow C, Gallacher J, Allen N, *et al.* UK Biobank: An Open Access Resource for Identifying the Causes of a Wide Range of Complex Diseases of Middle and Old Age. *PLoS Medicine* 2015;12(3):1-10.
5. Bycroft C, Freeman C, Petkova D, *et al.* The UK Biobank resource with deep phenotyping and genomic data. *Nature* 2018;562(7726):203-209.
6. MacArthur J, Bowler E, Cerezo M, *et al.* The new NHGRI-EBI Catalog of published genome-wide association studies (GWAS Catalog). *Nucleic Acids Res* 2017;45(D1):D896-D901.
7. Brenner DR, Amos CI, Brhane Y, *et al.* Identification of lung cancer histology-specific variants applying Bayesian framework variant prioritization approaches within the TRICL and ILCCO consortia. *Carcinogenesis* 2015;36(11):1314-26.
8. Poirier JG, Brennan P, McKay JD, *et al.* Informed genome-wide association analysis with family history as a secondary phenotype identifies novel loci of lung cancer. *Genetic Epidemiology* 2015;39(3):197-206.
9. Kachuri L, Amos CI, McKay JD, *et al.* Fine mapping of chromosome 5p15.33 based on a targeted deep sequencing and high density genotyping identifies novel lung cancer susceptibility loci. *Carcinogenesis* 2016;37(1):96-105.
10. Bosse Y, Amos CI. A Decade of GWAS Results in Lung Cancer. *Cancer Epidemiol Biomarkers Prev* 2018;27(4):363-379.
11. Weissfeld JL, Lin Y, Lin HM, *et al.* Lung Cancer Risk Prediction Using Common SNPs Located in GWAS-Identified Susceptibility Regions. *J Thorac Oncol* 2015;10(11):1538-45.
12. Friedman J, Hastie T, Tibshirani R. Regularization Paths for Generalized Linear Models via Coordinate Descent. *J Stat Softw* 2010;33(1):1-22.

13. Huang Y, Li W, Macheret F, Gabriel RA, Ohno-Machado L. A tutorial on calibration measurements and calibration models for clinical prediction models. *J Am Med Inform Assoc* 2020;27(4):621-633.
14. Spiegelhalter DJ. Probabilistic prediction in patient management and clinical trials. *Stat Med* 1986;5(5):421-33.
15. Benichou J, Gail MH. Estimates of absolute cause-specific risk in cohort studies. *Biometrics* 1990;46(3):813-26.
16. CRUK. Lung cancer, age-specific incidence rates, 2012-2014. In: *Cancer Research UK*; 2017.
17. Pirie K, Peto R, Green J, *et al.* Lung cancer in never smokers in the UK Million Women Study. *Int J Cancer* 2016;139(2):347-54.
18. Wakelee HA, Chang ET, Gomez SL, *et al.* Lung cancer incidence in never smokers. *J Clin Oncol* 2007;25(5):472-8.
19. Maas P, Wheeler W, N. BM, *et al.* iCARE (individualized Coherent Absolute Risk Estimators). In: *the National Cancer Institute*; 2016.
20. Choudhury PP, P. M, Wilcox A, *et al.* iCARE: R package to build, validate and apply absolute risk models. *BioRxiv* 2018.
21. CDC. United States Cancer Statistics: 1999 - 2013 Incidence Archive. In: *United States Department of Health and Human Services, Centers for Disease Control and Prevention and National Cancer Institute*; 2016.
22. Pinsky PF, Berg CD. Applying the National Lung Screening Trial eligibility criteria to the US population: what percent of the population and of incident lung cancers would be covered? *J Med Screen* 2012;19(3):154-6.



Supplementary Table 1: Annotation of the genetic variants included in the polygenic risk scores

| Polygenic risk score | SNP                      | Chr | Position  | Locus  | Gene          | reference | effect | EAF  | OncoArray & ILCCO meta analysis    |           | OncoArray lasso analysis |
|----------------------|--------------------------|-----|-----------|--------|---------------|-----------|--------|------|------------------------------------|-----------|--------------------------|
|                      |                          |     |           |        |               |           |        |      | Odds ratio (95% CI)                | Pvalue    | Odds ratio               |
| PRS-35               | rs71658797               | 1   | 77967507  | p31.1  | AK5           | T         | A      | 0.1  | 1.14(1.09,1.18)                    | 3.25E-11  | NA                       |
|                      | rs13080835               | 3   | 189357199 | q28    | TP63          | G         | T      | 0.49 | 0.94(0.92,0.97)                    | 1.25E-06  | NA                       |
|                      | rs7705526                | 5   | 1285974   | p15.33 | TERT          | C         | A      | 0.34 | 1.12(1.10,1.15)                    | 1.01E-18  | NA                       |
|                      | rs112290073              | 5   | 1286032   | p15.33 | TERT          | G         | A      | 0.01 | <b>1.39(1.20,1.61)<sup>b</sup></b> | 1.16E-05  | NA                       |
|                      | rs2736098                | 5   | 1294086   | p15.33 | TERT          | C         | T      | 0.28 | <b>1.14(1.10,1.18)<sup>b</sup></b> | 4.36E-13  | NA                       |
|                      | rs2853668                | 5   | 1300025   | p15.33 | TERT          | G         | T      | 0.24 | 1.08(1.05,1.11)                    | 9.36E-09  | NA                       |
|                      | rs401681                 | 5   | 1322087   | p15.33 | CLPTM1L       | C         | T      | 0.43 | 0.87(0.85,0.89)                    | 3.25E-30  | NA                       |
|                      | rs466502                 | 5   | 1325767   | p15.33 | CLPTM1L       | A         | G      | 0.44 | 0.91(0.89,0.93)                    | 1.99E-15  | NA                       |
|                      | rs6903823                | 6   | 28354519  | p22.1  | ZKSCAN3       | A         | G      | 0.2  | 1.07(1.04,1.10)                    | 1.09E-05  | NA                       |
|                      | rs116822326              | 6   | 31434111  | p21.33 |               | A         | G      | 0.16 | 1.15(1.12,1.19)                    | 5.29E-19  | NA                       |
|                      | rs2855812                | 6   | 31504943  | p21.33 | MICB          | G         | T      | 0.22 | 1.05(1.03,1.08)                    | 1.26E-04  | NA                       |
|                      | rs805262                 | 6   | 31628733  | p21.33 | C6orf47       | C         | T      | 0.47 | 1.07(1.04,1.09)                    | 1.50E-08  | NA                       |
|                      | rs6916278                | 6   | 31678774  | p21.33 | LY6G6F-LY6G6D | G         | A      | 0.05 | 0.90(0.86,0.95)                    | 1.15E-04  | NA                       |
|                      | rs3129763                | 6   | 32590925  | p21.32 |               | G         | A      | 0.22 | 1.12(1.09,1.15)                    | 8.48E-16  | NA                       |
|                      | rs114544105 <sup>a</sup> | 6   | 32667852  | p21.32 | HLA-DQB1      | G         | A      | 0.2  | 1.06(1.02,1.09)                    | 9.14E-04  | NA                       |
|                      | rs6920364 <sup>a</sup>   | 6   | 167376466 | q27    |               | G         | C      | 0.46 | 1.07(1.05,1.10)                    | 1.29E-08  | NA                       |
|                      | rs11780471               | 8   | 27344719  | p21.2  | EPHX2         | G         | A      | 0.06 | 0.87(0.83,0.91)                    | 1.69E-08  | NA                       |
|                      | rs4236709                | 8   | 32410110  | p12    | NRG1          | A         | G      | 0.22 | 1.07(1.04,1.10)                    | 5.88E-06  | NA                       |
|                      | rs885518                 | 9   | 21830157  | p21.3  | MTAP          | A         | G      | 0.1  | 1.09(1.05,1.13)                    | 2.13E-06  | NA                       |
|                      | rs2007153                | 9   | 136503819 | q34.2  | DBH           | C         | T      | 0.37 | 0.96(0.93,0.98)                    | 2.49E-04  | NA                       |
|                      | rs11591710               | 10  | 105687632 | q24.33 |               | A         | C      | 0.14 | 1.07(1.04,1.11)                    | 3.53E-05  | NA                       |
|                      | rs1056562                | 11  | 118125625 | q23.3  | MPZL2         | C         | T      | 0.48 | 1.07(1.04,1.09)                    | 1.92E-08  | NA                       |
|                      | rs7953330                | 12  | 998819    | p13.33 | WNK1          | G         | C      | 0.31 | 0.92(0.89,0.94)                    | 6.10E-12  | NA                       |
|                      | rs11571833               | 13  | 32972626  | q13.1  | BRCA2         | A         | T      | 0.01 | 1.60(1.43,1.80)                    | 6.12E-16  | NA                       |
|                      | rs689647                 | 15  | 43762196  | q15.3  | TP53BP1       | C         | T      | 0.11 | 0.93(0.90,0.97)                    | 2.11E-04  | NA                       |
|                      | rs66759488               | 15  | 47577451  | q21.1  | SEMA6D        | G         | A      | 0.36 | 1.07(1.04,1.10)                    | 2.83E-08  | NA                       |
|                      | rs77468143               | 15  | 49376624  | q21.1  |               | T         | G      | 0.25 | 0.92(0.90,0.95)                    | 1.00E-09  | NA                       |
|                      | rs3885951                | 15  | 78825917  | q25.1  | HYKK          | A         | G      | 0.11 | <b>1.17(1.12,1.23)<sup>b</sup></b> | 4.09E-10  | NA                       |
|                      | rs55781567               | 15  | 78857986  | q25.1  | CHRNA5        | C         | G      | 0.37 | 1.30(1.27,1.33)                    | 3.08E-103 | NA                       |
|                      | rs7177699                | 15  | 79089734  | q25.1  | ADAMTS7       | T         | C      | 0.44 | 1.13(1.11,1.16)                    | 5.98E-26  | NA                       |
|                      | rs62070270               | 17  | 29936962  | q11.2  | EFCAB5        | A         | G      | 0.45 | 1.03(1.01,1.06)                    | 7.24E-03  | NA                       |
|                      | rs1542752                | 17  | 72938100  | q25.1  | OTOP3         | C         | T      | 0.16 | 1.04(1.01,1.07)                    | 1.24E-02  | NA                       |
|                      | rs56113850               | 19  | 41353107  | q13.2  | CYP2A6        | C         | T      | 0.44 | 0.88(0.86,0.91)                    | 5.02E-19  | NA                       |
|                      | rs41309931               | 20  | 62326579  | q13.33 | RTEL1         | G         | T      | 0.12 | 1.08(1.04,1.12)                    | 2.23E-05  | NA                       |
|                      | rs17879961               | 22  | 29121087  | q12.1  | CHEK2         | A         | G      | 0.01 | 0.60(0.52,0.70)                    | 1.54E-10  | NA                       |
|                      |                          |     |           |        |               |           |        |      |                                    |           |                          |
|                      | rs71641333               | 1   | 78743005  | p31.1  | MGC27382      | T         | A      | 0.06 | 1.14(1.09,1.21)                    | 4.49E-07  | 1.03                     |
|                      | rs78062588               | 1   | 154566225 | q21.3  | ADAR          | T         | C      | 0.06 | 0.88(0.84,0.93)                    | 4.60E-07  | 0.95                     |
|                      | rs114737056              | 1   | 168511081 | q24.2  | XCL2          | G         | A      | 0.12 | 0.91(0.88,0.94)                    | 5.80E-07  | 0.95                     |
|                      | rs145733018              | 2   | 38567201  | p22.2  | ATL2          | T         | C      | 0.02 | 2.20(1.61,3.00)                    | 7.24E-07  | 1.04                     |
|                      | rs79368540               | 2   | 45189737  | p21    |               | C         | T      | 0.15 | 1.09(1.06,1.13)                    | 6.13E-07  | 1.05                     |
|                      | rs11692700 <sup>a</sup>  | 2   | 67510377  | p14    | LINC01828     | T         | C      | 0.03 | 1.20(1.12,1.29)                    | 6.44E-07  | 1.05                     |
|                      | rs114928225              | 2   | 119449740 | q14.2  |               | T         | A      | 0.01 | 1.65(1.35,2.01)                    | 7.24E-07  | 1.17                     |
|                      | rs7592999                | 2   | 140398327 | q22.1  |               | T         | C      | 0.04 | 0.81(0.74,0.88)                    | 7.35E-07  | 0.92                     |
|                      | rs722864                 | 2   | 173983204 | q31.1  | MAP3K20       | G         | A      | 0.19 | 0.93(0.90,0.96)                    | 5.53E-07  | 0.99                     |
|                      | rs1866631 <sup>a</sup>   | 2   | 174075761 | q31.1  | MAP3K20       | A         | G      | 0.4  | 0.94(0.92,0.96)                    | 6.97E-07  | 0.99                     |
|                      | rs185666783              | 4   | 67833774  | q13.2  | LOC105377262  | C         | G      | 0.29 | 0.92(0.90,0.95)                    | 9.20E-08  | 1.06                     |
|                      | rs7676823                | 4   | 164007992 | q32.2  |               | A         | G      | 0.34 | 0.92(0.89,0.95)                    | 6.71E-07  | 0.98                     |
|                      | rs78154696               | 5   | 1000156   | p15.33 |               | G         | A      | 0.03 | 1.22(1.13,1.32)                    | 7.55E-07  | 1.09                     |
|                      | rs112333466              | 5   | 1249816   | p15.33 | TERT          | C         | T      | 0.01 | 1.55(1.32,1.81)                    | 8.11E-08  | 1.07                     |
|                      | rs56345976               | 5   | 1276873   | p15.33 | TERT          | A         | G      | 0.42 | 1.10(1.07,1.13)                    | 2.60E-12  | 1.02                     |
|                      | rs2853677                | 5   | 1287194   | p15.33 | TERT          | A         | G      | 0.42 | 1.12(1.09,1.15)                    | 2.66E-18  | 1.06                     |
|                      | rs112401627              | 5   | 1300269   | p15.33 |               | G         | A      | 0.03 | 1.30(1.20,1.42)                    | 3.03E-10  | 1.05                     |

| Polygenic risk score |                          |     |           |        |               |           |        |      | OncoArray & ILCCO meta analysis |          | OncoArray lasso analysis |
|----------------------|--------------------------|-----|-----------|--------|---------------|-----------|--------|------|---------------------------------|----------|--------------------------|
|                      | SNP                      | Chr | Position  | Locus  | Gene          | reference | effect | EAF  | Odds ratio (95% CI)             | Pvalue   | Odds ratio               |
|                      | rs6875416                | 5   | 90250631  | q14.3  | ADGRV1        | A         | T      | 0.21 | 0.83(0.78,0.90)                 | 6.99E-07 | 0.96                     |
|                      | rs114136906              | 5   | 150121458 | q33.1  | DCTN4         | G         | C      | 0.02 | 1.46(1.27,1.68)                 | 1.17E-07 | 1.14                     |
|                      | rs2316515                | 6   | 410848    | p25.3  | IRF4          | G         | A      | 0.41 | 0.92(0.89,0.95)                 | 1.42E-07 | 0.96                     |
|                      | rs629444                 | 6   | 25885814  | p22.2  | HIST1H2APS2   | C         | T      | 0.1  | 1.11(1.07,1.15)                 | 1.40E-08 | 1.00                     |
|                      | rs2179517                | 6   | 26198845  | p22.2  | HIST1H3D      | G         | C      | 0.49 | 0.94(0.92,0.96)                 | 3.99E-08 | 1.00                     |
|                      | rs68141011               | 6   | 28217797  | p22.1  | ZKSCAN4       | G         | T      | 0.13 | 1.09(1.06,1.13)                 | 1.43E-07 | 0.99                     |
|                      | rs114722608              | 6   | 29223493  | p22.1  | LOC101929006  | G         | C      | 0.09 | 1.15(1.11,1.20)                 | 7.09E-12 | 0.79                     |
|                      | rs115123779              | 6   | 29477821  | p22.1  | LOC105375009  | G         | T      | 0.18 | 1.10(1.07,1.13)                 | 1.91E-09 | 1.01                     |
|                      | rs138488080              | 6   | 29606761  | p22.1  | SUMO2P1       | G         | A      | 0.15 | 1.15(1.11,1.19)                 | 5.96E-18 | 1.00                     |
|                      | rs114192654              | 6   | 29759750  | p22.1  |               | G         | A      | 0.34 | 1.06(1.04,1.09)                 | 5.69E-07 | 0.98                     |
|                      | rs116675020              | 6   | 29922740  | p22.1  | HLA-W         | A         | G      | 0.38 | 0.94(0.91,0.96)                 | 6.72E-07 | 0.99                     |
|                      | rs115993819              | 6   | 30074163  | p22.1  | TRIM31        | G         | A      | 0.24 | 1.09(1.06,1.12)                 | 9.64E-10 | 1.00                     |
|                      | rs116534499              | 6   | 30138162  | p22.1  | TRIM15        | C         | G      | 0.43 | 1.07(1.04,1.09)                 | 2.94E-08 | 1.01                     |
|                      | rs116629156              | 6   | 30864829  | p21.33 | DDR1          | T         | C      | 0.41 | 1.07(1.05,1.10)                 | 1.52E-08 | 1.00                     |
|                      | rs114103504              | 6   | 31002452  | p21.33 | MUC22         | A         | G      | 0.49 | 0.93(0.91,0.95)                 | 3.29E-09 | 0.98                     |
|                      | rs114052224              | 6   | 31067852  | p21.33 |               | A         | G      | 0.48 | 1.06(1.04,1.09)                 | 1.26E-07 | 1.02                     |
|                      | rs2233959                | 6   | 31081065  | p21.33 | C6orf15       | T         | C      | 0.41 | 1.07(1.05,1.10)                 | 5.14E-09 | 1.01                     |
|                      | rs114689412              | 6   | 31117577  | p21.33 | CCHCR1        | C         | G      | 0.13 | 0.91(0.88,0.94)                 | 3.64E-07 | 1.00                     |
|                      | rs2596499                | 6   | 31321429  | p21.33 | HLA-B         | T         | A      | 0.3  | 1.07(1.04,1.10)                 | 3.42E-07 | 0.99                     |
|                      | rs2596496                | 6   | 31322782  | p21.33 | HLA-B         | G         | C      | 0.36 | 0.90(0.87,0.94)                 | 3.64E-07 | 0.99                     |
|                      | rs2596490 <sup>a</sup>   | 6   | 31324996  | p21.33 |               | C         | G      | 0.23 | 0.87(0.83,0.92)                 | 2.82E-08 | 1.01                     |
|                      | rs115176861              | 6   | 31412961  | p21.33 | HCP5          | T         | C      | 0.48 | 1.06(1.04,1.09)                 | 1.11E-07 | 1.03                     |
|                      | rs553108                 | 6   | 31840455  | p21.33 | SLC44A4       | G         | A      | 0.38 | 1.07(1.04,1.09)                 | 6.63E-08 | 1.00                     |
|                      | rs115200960 <sup>a</sup> | 6   | 32335204  | p21.32 | C6orf10       | G         | A      | 0.17 | 1.11(1.07,1.14)                 | 4.77E-11 | 1.00                     |
|                      | rs12722051               | 6   | 32609147  | p21.32 | HLA-DQA1      | A         | T      | 0.18 | 0.87(0.83,0.92)                 | 4.96E-07 | 0.98                     |
|                      | rs116767258              | 6   | 32757737  | p21.32 |               | A         | G      | 0.39 | 0.94(0.92,0.96)                 | 9.10E-07 | 0.96                     |
|                      | rs7383287                | 6   | 32783086  | p21.32 | HLA-DOB       | A         | G      | 0.2  | 1.10(1.07,1.13)                 | 1.12E-10 | 1.03                     |
|                      | rs117534741              | 6   | 72384541  | q13    |               | G         | A      | 0.02 | 1.24(1.14,1.34)                 | 4.68E-07 | 1.17                     |
|                      | rs1321817                | 6   | 117734267 | q22.1  | ROS1          | A         | G      | 0.37 | 0.92(0.89,0.95)                 | 5.67E-07 | 0.99                     |
|                      | rs6957511                | 7   | 130668618 | q32.3  | LINC-PINT     | T         | C      | 0.4  | 1.10(1.06,1.14)                 | 9.78E-07 | 1.02                     |
|                      | rs2565064                | 8   | 27327841  | p21.2  | CHRNA2        | G         | C      | 0.29 | 1.07(1.04,1.10)                 | 4.58E-07 | 1.03                     |
|                      | rs67749759               | 8   | 27397087  | p21.2  | EPHX2         | C         | T      | 0.07 | 1.13(1.08,1.19)                 | 2.66E-07 | 1.03                     |
|                      | rs111960002              | 8   | 144722420 | q24.3  | ZNF623        | T         | C      | 0.05 | 1.36(1.21,1.54)                 | 4.62E-07 | 1.04                     |
|                      | rs10118776               | 9   | 6227418   | p24.1  | IL33          | A         | G      | 0.06 | 1.34(1.20,1.50)                 | 3.91E-07 | 1.08                     |
|                      | rs17185553 <sup>a</sup>  | 9   | 17934120  | p22.2  |               | G         | C      | 0.08 | 1.29(1.17,1.43)                 | 8.94E-07 | 1.02                     |
|                      | rs2518717                | 9   | 21959751  | p21.3  | RP11-145E5.5  | T         | C      | 0.36 | 1.09(1.06,1.13)                 | 3.35E-07 | 1.00                     |
|                      | rs28557075               | 9   | 22066572  | p21.3  | CDKN2B-AS1    | G         | A      | 0.09 | 1.11(1.06,1.16)                 | 8.43E-07 | 1.11                     |
|                      | rs1333040                | 9   | 22083404  | p21.3  | CDKN2B-AS1    | T         | C      | 0.46 | 1.10(1.06,1.14)                 | 7.02E-07 | 1.00                     |
|                      | rs4879704                | 9   | 33427322  | p13.3  |               | A         | C      | 0.33 | 0.92(0.89,0.95)                 | 9.16E-07 | 0.98                     |
|                      | rs191205566              | 9   | 102587233 | q22.33 | NR4A3         | C         | T      | 0.02 | 1.40(1.24,1.59)                 | 1.17E-07 | 1.21                     |
|                      | rs75685923               | 9   | 136275229 | q34.2  | REXO4         | C         | T      | 0.03 | 1.38(1.22,1.57)                 | 6.16E-07 | 1.09                     |
|                      | rs7897454                | 10  | 102011702 | q24.31 | CWF19L1       | G         | A      | 0.04 | 1.25(1.14,1.36)                 | 6.64E-07 | 1.06                     |
|                      | rs62621207               | 10  | 102672248 | q24.31 | SLF2          | A         | T      | 0.05 | 1.16(1.09,1.23)                 | 5.85E-07 | 1.07                     |
|                      | rs78853063               | 11  | 57250026  | q12.1  | SLC43A1       | C         | T      | 0.08 | 0.89(0.85,0.93)                 | 4.65E-07 | 0.97                     |
|                      | rs78334599               | 11  | 115998756 | q23.3  |               | G         | A      | 0.04 | 0.86(0.80,0.91)                 | 7.93E-07 | 0.89                     |
|                      | rs7487683                | 12  | 1036042   | p13.33 | RAD52         | C         | T      | 0.04 | 0.83(0.77,0.89)                 | 6.58E-08 | 0.94                     |
|                      | rs73351723               | 12  | 58831070  | q14.1  |               | G         | A      | 0.13 | 1.09(1.06,1.13)                 | 3.81E-07 | 1.00                     |
|                      | rs9668978                | 12  | 64913237  | q14.2  | RP11-439H13.2 | G         | T      | 0.29 | 1.10(1.06,1.14)                 | 6.24E-07 | 1.05                     |
|                      | rs9602270                | 13  | 84281063  | q31.1  |               | A         | T      | 0.05 | 1.27(1.16,1.39)                 | 3.28E-07 | 1.04                     |
|                      | rs8003466                | 14  | 34013721  | q13.1  | NPAS3         | G         | A      | 0.18 | 0.89(0.84,0.93)                 | 5.27E-07 | 0.96                     |
|                      | rs8031813                | 15  | 49253961  | q21.1  | SHC4          | A         | C      | 0.31 | 0.91(0.87,0.94)                 | 4.29E-08 | 0.99                     |
|                      | rs6493361                | 15  | 49615952  | q21.2  | GALK2         | C         | G      | 0.34 | 1.09(1.05,1.12)                 | 7.09E-07 | 1.02                     |
|                      | rs11855650               | 15  | 70431773  | q23    |               | G         | T      | 0.38 | 1.09(1.05,1.12)                 | 5.60E-07 | 1.06                     |
|                      | rs79149102               | 15  | 75055819  | q24.1  |               | C         | T      | 0.03 | 1.18(1.11,1.25)                 | 1.54E-07 | 1.09                     |

PRS-93

| Polygenic risk score | SNP                            | Chr | Position | Locus  | Gene                 | reference | effect | EAF  | OncoArray & ILCCO meta analysis |          | OncoArray lasso analysis |
|----------------------|--------------------------------|-----|----------|--------|----------------------|-----------|--------|------|---------------------------------|----------|--------------------------|
|                      |                                |     |          |        |                      |           |        |      | Odds ratio (95% CI)             | Pvalue   | Odds ratio               |
|                      | rs2229961                      | 15  | 78880752 | q25.1  | <i>CHRNA5</i>        | G         | A      | 0.02 | 1.43(1.30,1.57)                 | 5.01E-14 | 1.05                     |
|                      | rs8192479                      | 15  | 78909398 | q25.1  | <i>CHRNA3</i>        | C         | T      | 0.02 | 1.28(1.17,1.40)                 | 2.29E-08 | 1.08                     |
|                      | rs2869551                      | 15  | 78981423 | q25.1  | <i>CHRNA4</i>        | A         | G      | 0.01 | 0.75(0.67,0.84)                 | 5.09E-07 | 0.91                     |
|                      | <b>rs12593207<sup>a</sup></b>  | 15  | 78987225 | q25.1  | <i>CHRNA4</i>        | G         | A      | 0.1  | 0.85(0.82,0.89)                 | 2.88E-14 | 1.01                     |
|                      | <b>rs189146505<sup>a</sup></b> | 15  | 79058730 | q25.1  | <i>ADAMTS7</i>       | A         | G      | 0.04 | 0.83(0.78,0.89)                 | 8.34E-08 | 1.00                     |
|                      | <b>rs28450923<sup>a</sup></b>  | 15  | 79065557 | q25.1  | <i>ADAMTS7</i>       | A         | G      | 0.13 | 0.88(0.84,0.92)                 | 7.76E-08 | 0.99                     |
|                      | rs28624856                     | 15  | 79075233 | q25.1  | <i>ADAMTS7</i>       | T         | C      | 0.24 | 0.91(0.88,0.94)                 | 1.06E-09 | 1.00                     |
|                      | rs77719127                     | 15  | 79110783 | q25.1  | <i>MORF4L1</i>       | C         | T      | 0.17 | 1.14(1.10,1.18)                 | 1.79E-13 | 1.00                     |
|                      | rs76164573                     | 15  | 79198760 | q25.1  |                      | T         | G      | 0.04 | 0.86(0.81,0.91)                 | 8.83E-07 | 0.97                     |
|                      | rs78442819                     | 16  | 10740982 | p13.13 | <i>TEK5</i>          | G         | C      | 0.19 | 0.89(0.85,0.93)                 | 6.48E-07 | 0.97                     |
|                      | rs9926896                      | 16  | 26980646 | p12.1  |                      | T         | C      | 0.01 | 2.70(1.90,3.83)                 | 3.06E-08 | 1.22                     |
|                      | rs17181550                     | 17  | 70299958 | q24.3  |                      | T         | G      | 0.43 | 0.94(0.92,0.96)                 | 1.98E-07 | 0.97                     |
|                      | rs79421398                     | 18  | 20741135 | q11.2  | <i>CABLES1</i>       | T         | C      | 0.05 | 1.23(1.14,1.34)                 | 2.75E-07 | 1.04                     |
|                      | rs66500423                     | 19  | 41195170 | q13.2  | <i>NUMBL</i>         | T         | C      | 0.3  | 1.07(1.04,1.09)                 | 2.23E-07 | 1.01                     |
|                      | rs4803356                      | 19  | 41207206 | q13.2  | <i>ADCK4</i>         | C         | G      | 0.07 | 0.89(0.85,0.93)                 | 8.31E-07 | 1.00                     |
|                      | <b>rs11881918<sup>a</sup></b>  | 19  | 41334199 | q13.2  | <i>CTC-490E21.12</i> | G         | A      | 0.09 | 0.86(0.82,0.91)                 | 4.10E-09 | 0.93                     |
|                      | <b>rs2258380<sup>a</sup></b>   | 19  | 41338988 | q13.2  | <i>CTC-490E21.12</i> | C         | G      | 0.23 | 1.08(1.05,1.11)                 | 9.15E-07 | 0.99                     |
|                      | rs67210567                     | 19  | 41357457 | q13.2  | <i>CYP2A6</i>        | G         | T      | 0.03 | 0.79(0.73,0.86)                 | 2.96E-08 | 0.86                     |
|                      | rs184589612                    | 19  | 41412192 | q13.2  | <i>CTC-490E21.13</i> | T         | C      | 0.02 | 0.77(0.70,0.85)                 | 3.23E-07 | 0.90                     |
|                      | <b>rs12981718<sup>a</sup></b>  | 19  | 54567858 | q13.42 | <i>VSTM1</i>         | G         | A      | 0.07 | 1.36(1.21,1.53)                 | 2.13E-07 | 0.99                     |
|                      | rs13036436                     | 20  | 61988382 | q13.33 | <i>CHRNA4</i>        | A         | G      | 0.2  | 1.08(1.05,1.12)                 | 9.03E-07 | 1.09                     |
|                      | rs61541144                     | 20  | 62527305 | q13.33 | <i>DNAJC5</i>        | G         | A      | 0.07 | 0.89(0.85,0.93)                 | 5.61E-07 | 0.91                     |

<sup>a</sup> (bolded) SNPs not genotyped or imputed in the UK biobank based on Haplotype Reference Consortium (HRC) panel and therefore not included in PRS analysis in the UK Biobank

<sup>b</sup> Odds ratios for association with lung cancer in OncoArray analysis for SNPs with no OncoArray-ILCCO meta-analysis results

**Supplementary Table 2: Risk factors included for absolute risk projection in the UK Biobank and NLST studies**

|                                                     | Recalibrated PLCO <sup>c</sup> <sub>all2014</sub><br>(For overall population) | Never-Smoker Model | PLCO <sup>c</sup> <sub>m2012</sub><br>(For NLST)* |
|-----------------------------------------------------|-------------------------------------------------------------------------------|--------------------|---------------------------------------------------|
| Covariate                                           | Beta                                                                          | Beta               | Beta                                              |
| Age                                                 | 0.06962700                                                                    | 0.08374322         | 0.0778868                                         |
| Sex                                                 | --                                                                            | 0.27877676         | --                                                |
| Education                                           | -0.07691528                                                                   | 0.02989868         | -0.0812744                                        |
| Body Mass Index (kg/m <sup>2</sup> )                | -0.02532209                                                                   | -0.01309118        | -0.0274194                                        |
| Chronic obstructive pulmonary disease (0=No; 1=Yes) | 0.30376798                                                                    | --                 | 0.3553063                                         |
| Personal history of cancer (0=No; 1=Yes)            | 0.42383167                                                                    | 0.048212857        | 0.4589971                                         |
| Family history of lung cancer (0=No; 1=Yes)         | 0.51231807                                                                    | -0.08546407        | 0.587185                                          |
| FEV1/FVC                                            | --                                                                            | -1.64183399        | --                                                |
| Race/ethnicity                                      |                                                                               |                    |                                                   |
| White                                               | Reference                                                                     |                    |                                                   |
| Black                                               | 0.28093323                                                                    |                    | 0.3944778                                         |
| Hispanic                                            | -0.71758156                                                                   |                    | -0.7434744                                        |
| Asian                                               | -0.45847836                                                                   |                    | -0.466585                                         |
| Native Hawaiian/Pacific Islander                    | -1.19348237                                                                   |                    | 0                                                 |
| American Indian/Alaskan Native                      | 0.83336775                                                                    |                    | 1.027152                                          |
| Smoking Status                                      |                                                                               |                    |                                                   |
| 0 = Former smoker                                   | 2.22401218                                                                    |                    |                                                   |
| 1 = Current smoker                                  | 2.44904445                                                                    |                    |                                                   |
| Smoking intensity (average cigarettes/day)          | -0.15880855                                                                   |                    | -1.822606                                         |
| Duration smoked (per year)                          | 0.02672920                                                                    |                    | 0.0317321                                         |
| Smoking quit-time                                   | -0.02811095                                                                   |                    | -0.0308572                                        |
| Model Development Study                             | OncoArray                                                                     | OncoArray          | UK Biobank                                        |
| Polygenic risk score (PRS)                          |                                                                               |                    |                                                   |
| PRS_128 <sup>a</sup>                                | 0.663                                                                         |                    |                                                   |
| PRS_114 <sup>b</sup>                                |                                                                               | 0.45901616         | 0.462234                                          |

<sup>a</sup> Beta coefficient estimated in OncoArray adjusted for age, sex and top 5 PCs

<sup>b</sup> Beta coefficient estimated in UK Biobank, adjusted for age, sex and top 5 PCs

<sup>c</sup> Education, BMI, Smoking duration and Smoking quit-time were centered to the mean and Smoking intensity as modelled as a non-linear transformation as previously described.

\*PLCO<sub>m2012</sub> was applied to NLST because it is an ever-smoking only population.

**Supplementary Table 3: Area under the receiver operating characteristic curve (AUC) and 95% confidence intervals in UK Biobank for overall population, by smoking status, and for young -onset lung cancer**

| UKB Data                                 | Model             |             |                          |             |
|------------------------------------------|-------------------|-------------|--------------------------|-------------|
|                                          | Risk factors only |             | Risk factors + PRS terms |             |
|                                          | AUC               | 95%CI       | AUC                      | 95%CI       |
| Overall <sup>a</sup>                     | 0.828             | 0.807-0.850 | 0.832                    | 0.811-0.853 |
| Ever smokers <sup>a</sup>                | 0.785             | 0.762-0.809 | 0.786                    | 0.762-0.809 |
| Non-smokers <sup>b</sup>                 | 0.670             | 0.611-0.729 | 0.687                    | 0.628-0.746 |
| Young onset (<50 years old) <sup>a</sup> | 0.798             | 0.680-0.917 | 0.811                    | 0.701-0.922 |

PRS, polygenic risk score

<sup>a</sup> AUCs were based on the 50% hold-out validation set that was not used for re-calibration of the PLCO<sub>all2014</sub> model

<sup>b</sup> AUCs among never-smokers were based on the 20% testing set that was not used in the model development

**Supplementary Table 4: Average age when reaching a 5-year lung cancer absolute risk of at least 1.5% by PRS percentile in UK Biobank, stratified by smoking status and family history of lung cancer (FHLC).**

| PRS Group | Overall | Ever Smokers |           | Former Smokers |           | Current Smokers |           |
|-----------|---------|--------------|-----------|----------------|-----------|-----------------|-----------|
|           |         | Without FHLC | With FHLC | Without FHLC   | With FHLC | Without FHLC    | With FHLC |
| Top 1%    | 59      | 53           | 51        | 55             | 52        | 51              | 48        |
| 1-5%      | 61      | 56           | 52        | 57             | 53        | 52              | 48        |
| 5-10%     | 63      | 57           | 52        | 58             | 54        | 55              | 49        |
| Average   | 69      | 61           | 56        | 63             | 57        | 57              | 52        |

**Supplementary Figure 1: Flowchart of subject exclusions during the process of quality control procedures in (a) OncoArray for model building, and (b) UK Biobank, model validation**

(a) OncoArray

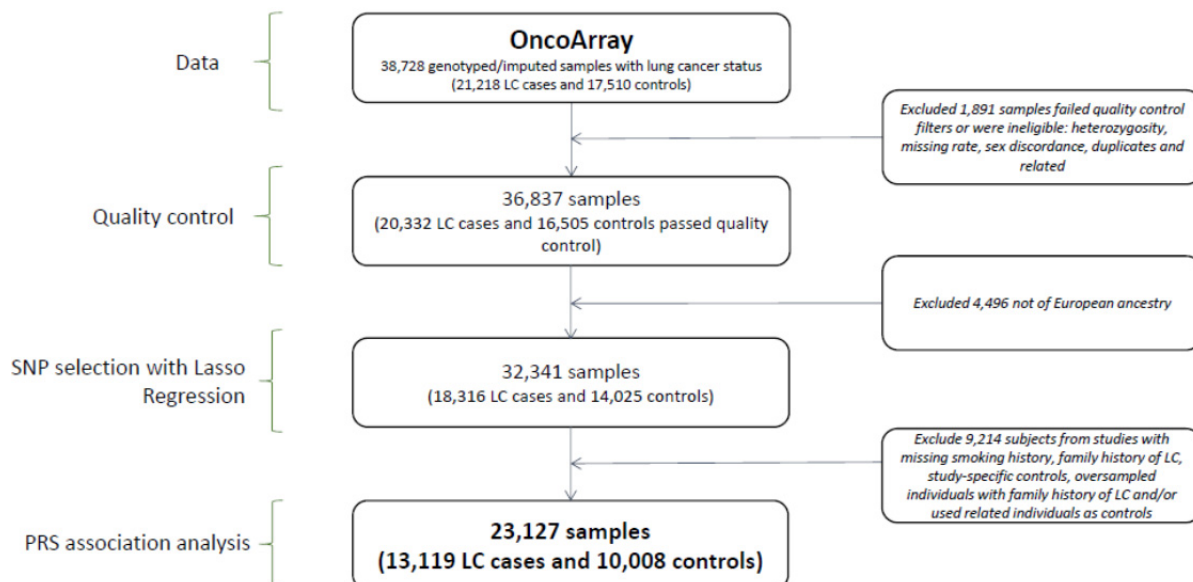

(b) UK Biobank

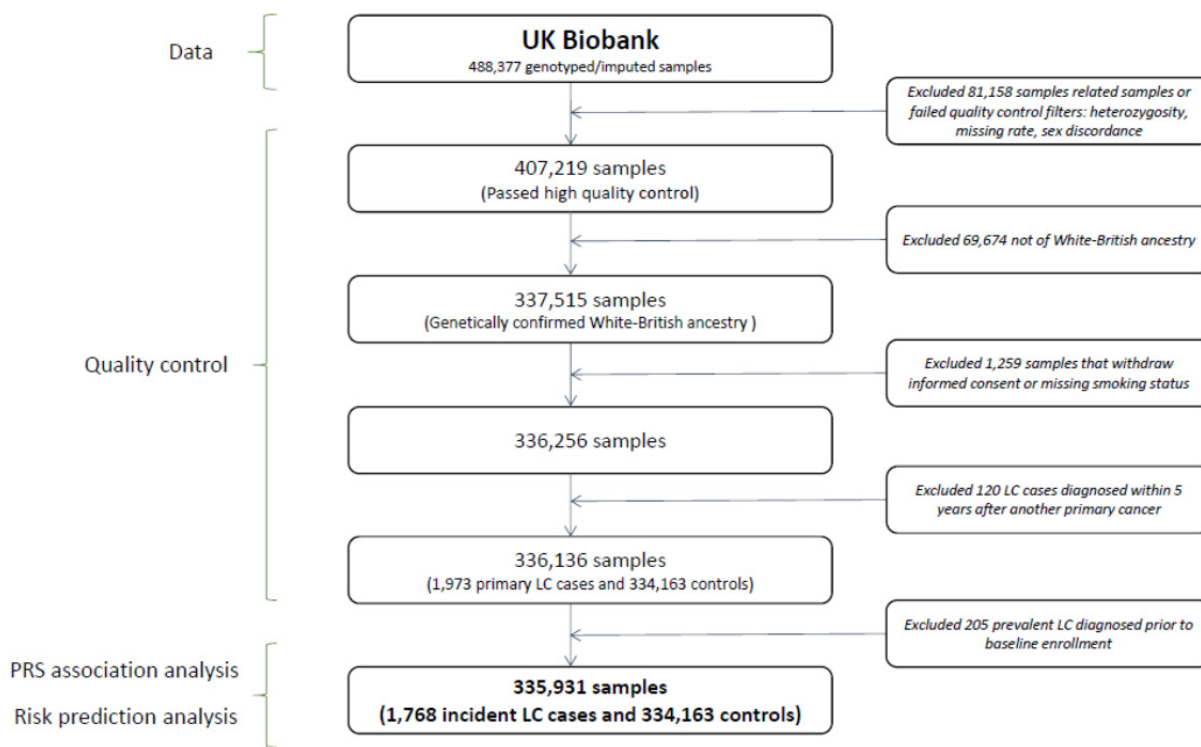

\*LC, lung cancer; PRS, polygenetic risk score

Supplementary Figure 2: Concept Framework and Analysis Flow

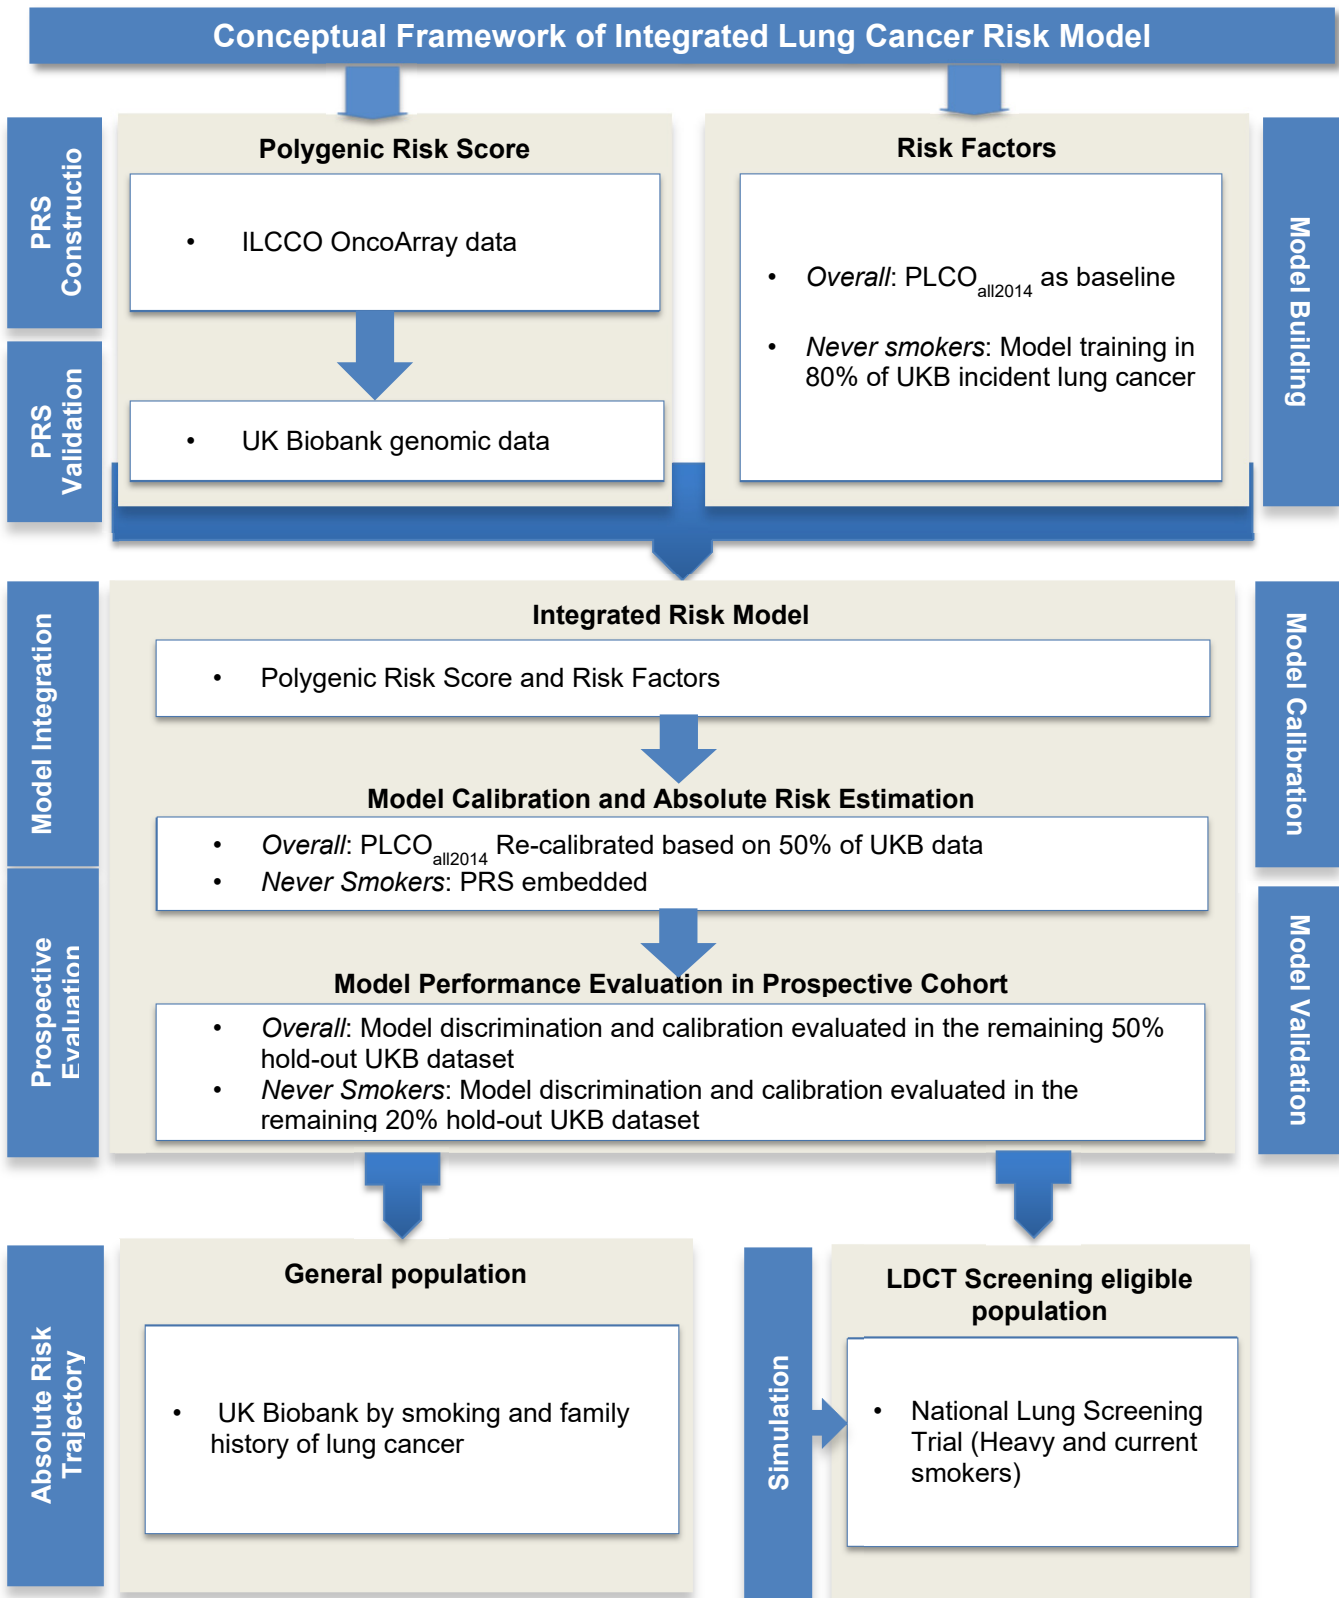



### Supplementary Figure 3: PRS distribution in OncoArray and UK Biobank

(a) OncoArray (PRS construction)

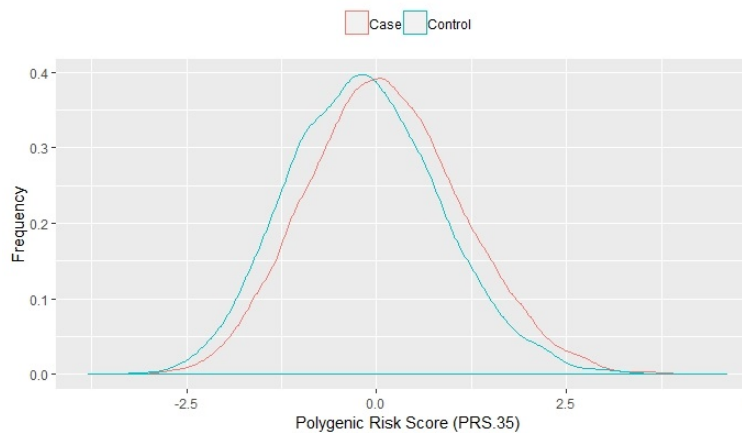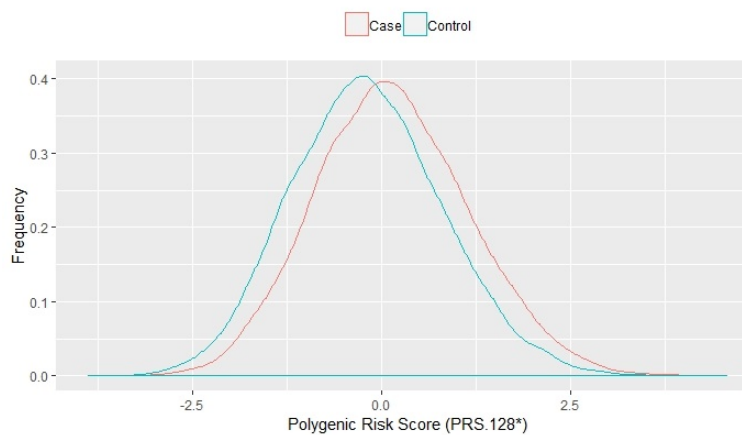

(b) UK Biobank (PRS validation)

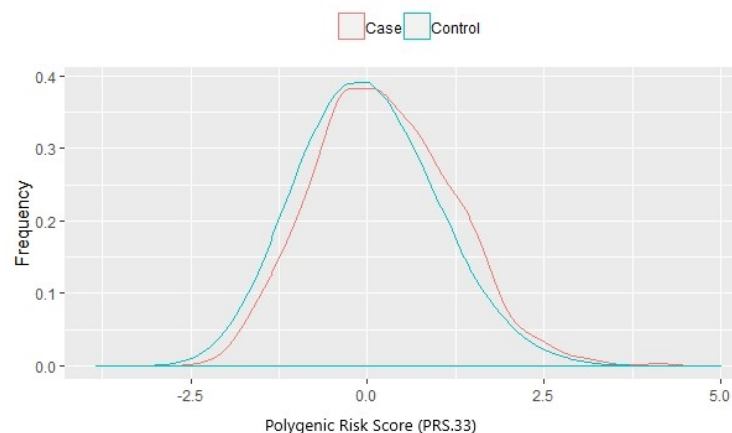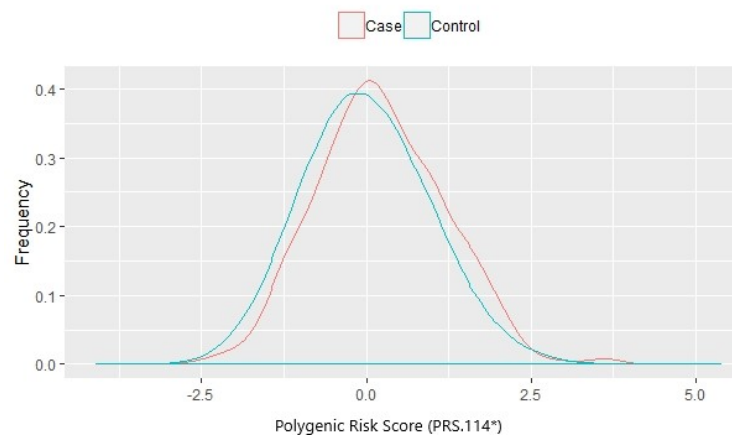

| PRS  | OncoArray |          |       | UK Biobank |          |       |
|------|-----------|----------|-------|------------|----------|-------|
|      | Cases     | Controls | Total | Cases      | Controls | Total |
| Mean | 0.86      | 0.68     | 0.78  | 0.59       | 0.48     | 0.48  |
| SD   | 0.53      | 0.52     | 0.54  | 0.50       | 0.50     | 0.50  |

**Supplementary Figure 4: Model calibration based on UK Biobank cohort including PRS-114 and all described risk factors comparing observed versus predicted risk** (a) **Overall population:** The data were randomly split into 50% for re-calibration and 50% as hold-out testing set for validation, and plotted based on risk deciles; (b) **Never-smokers:** the data were randomly split into 80% training and 20% testing set, where the training set was used to develop the risk model, and the model performance was evaluated in the hold-out testing set. The risks by quintiles are plotted in the hold-out testing set to reduce noise due to fewer lung cancers in each group. P-values are computed based on the Spiegelhalter's z statistic.

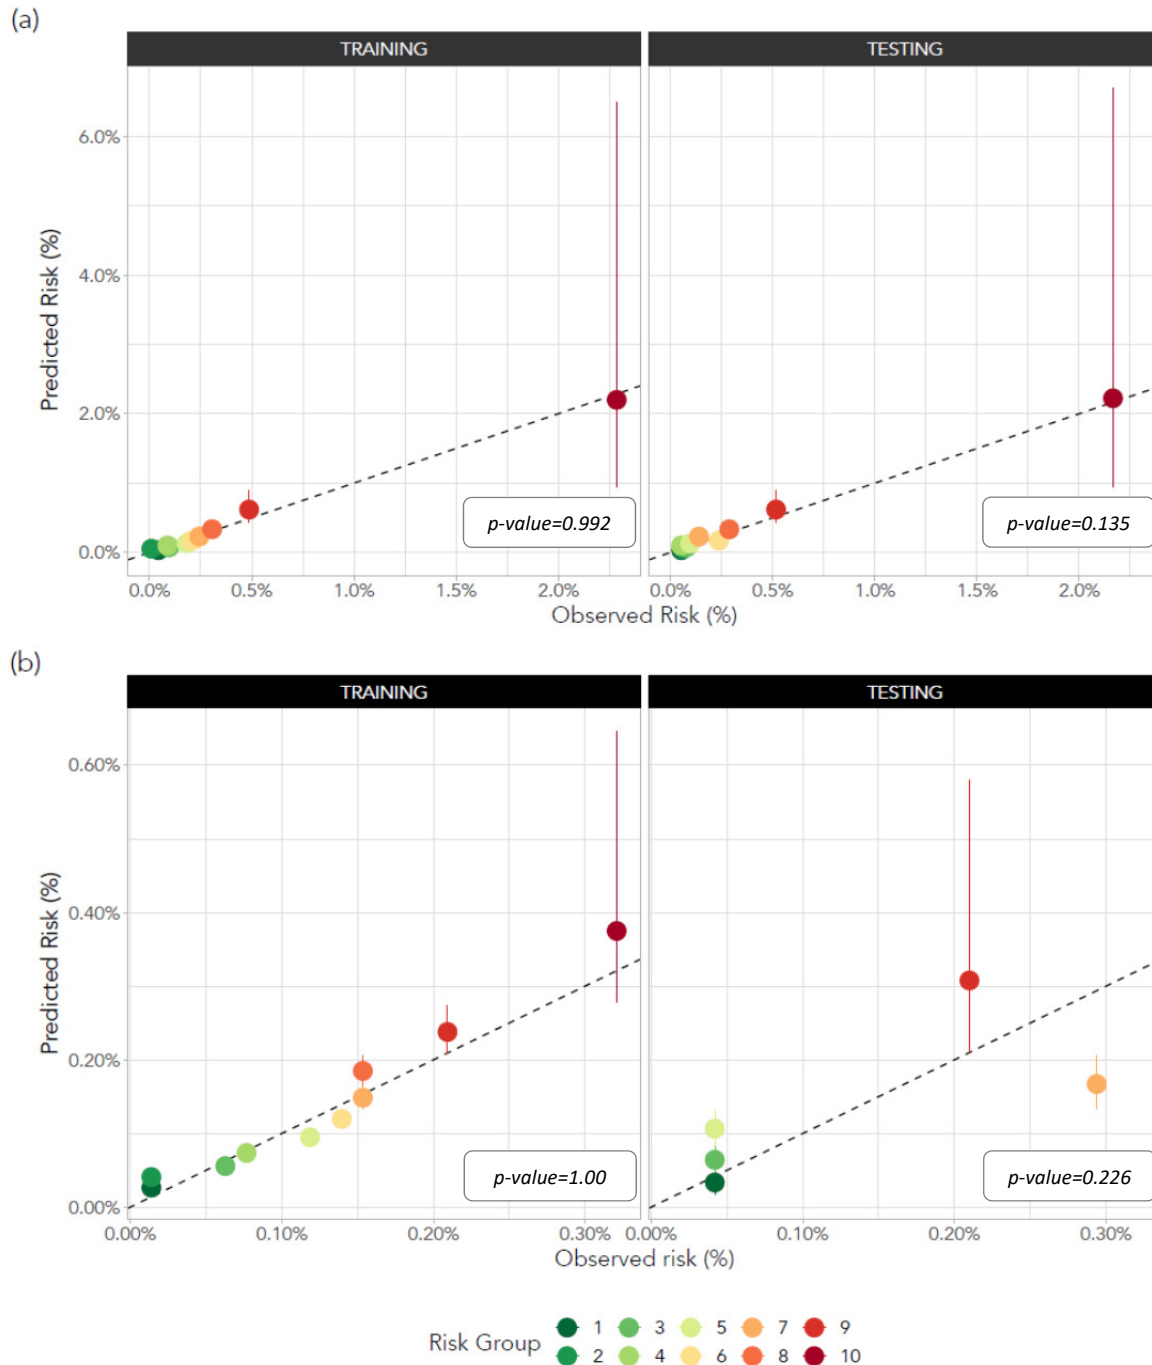

**Supplementary Figure 5: The 5-year absolute risk stratified by smoking status and PRS-114 in UK Biobank.**

The colored lines define PRS risk groups and the patterned lines define smoking status. Red solid line represents current smokers who are at top 10% of PRS decile, red dotted line represents former smokers who are at top 10% of decile, and red dashed line represents never smokers who are at top 10% of decile. Orange solid, dotted and dashed line represent current, former and never smokers who are at 10-90% of PRS decile, respectively, whereas green solid, dotted and dashed line represent current, former and never smokers at the lowest 10% of PRS decile.

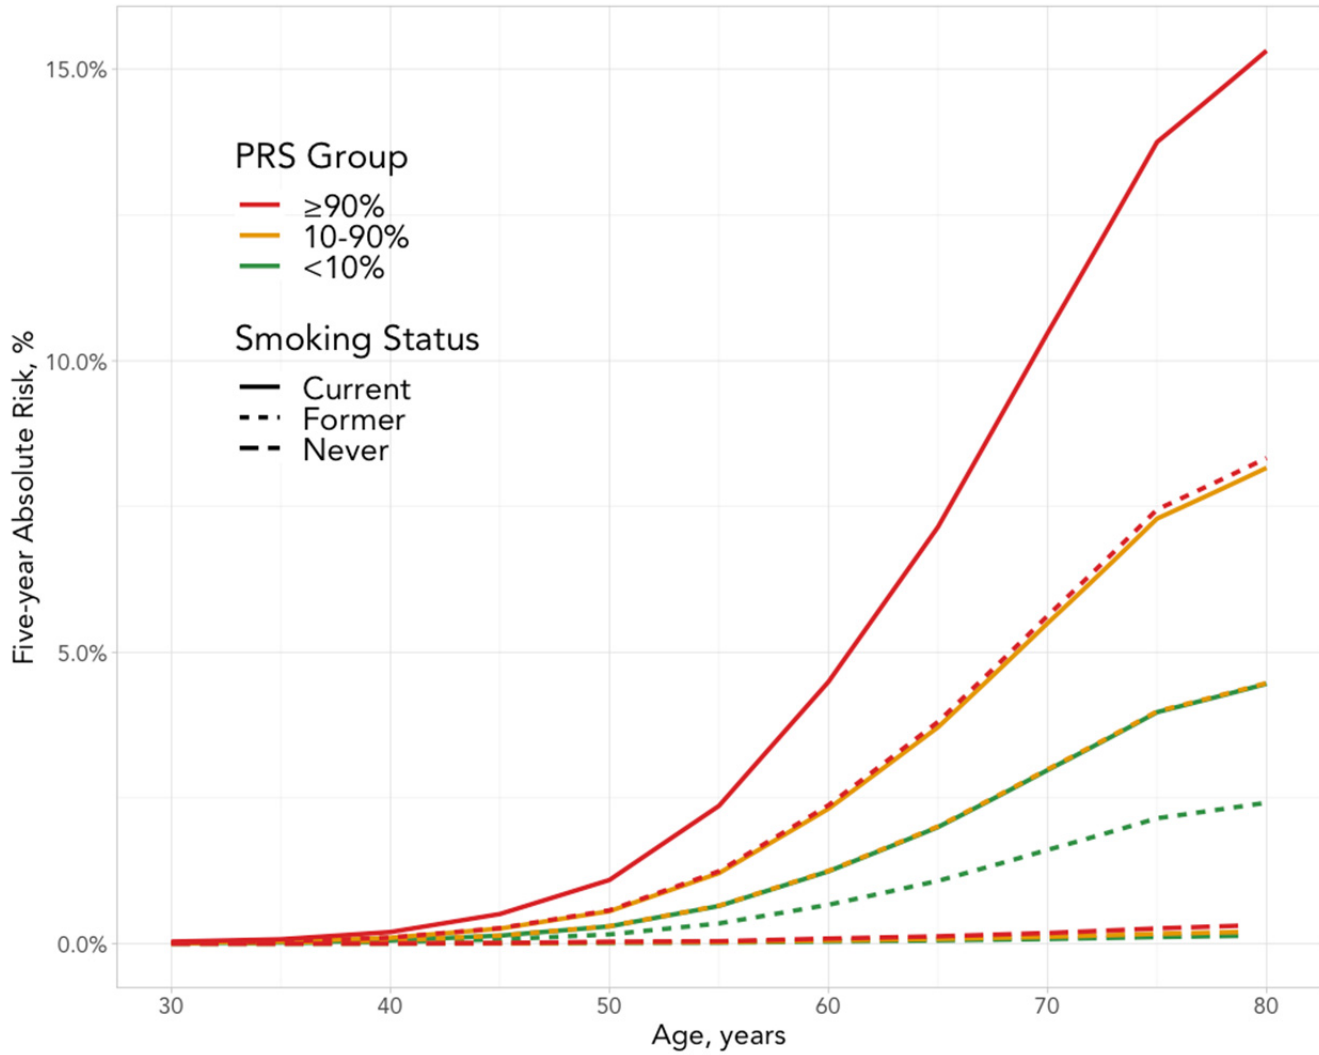

Supplement: NIHMS1665272-supplement-1.pdf [file NIHMS1665272-supplement-1.pdf]
